# Supplementary material for: Crosstalk between lymphoid and myeloid cells orchestrates glioblastoma immunity through Interleukin 10 signaling
Source: Research Square preprint supplement (doi:10.21203/rs.3.rs-244157/v1), 2021-02-17

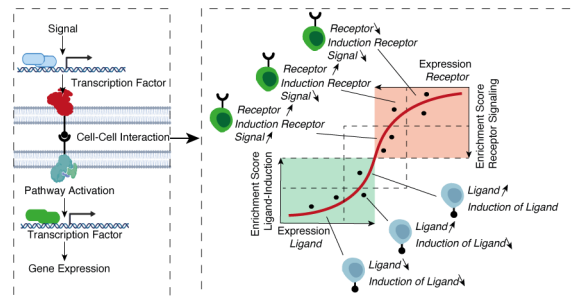

Supplement: Supplementary file [file 0d86b4b6a936982f71363893.pdf]
